# Supplementary material for: Cellulose nanofibrils: a rapid adsorbent for the removal of methylene blue
Source: Royal Society of Chemistry journal article supplement (doi:10.1039/c4ra15754k), 2015-01-01
Supplement: c4ra15754k1.pdf [file c4ra15754k1.pdf]

## Supplementary Information

### Cellulose nanofibrils: a rapid adsorbent for the removal of cationic dyes

#### HMF and Furfural Concentration

High-performance liquid chromatography (HPLC) system (Agilent 1260) was equipped with Agilent, Hi-Plex H column with UV detector. The temperature of the column and detector was set at 60 and 55 °C, respectively, while a mobile phase 5 mmol H<sub>2</sub>SO<sub>4</sub> was used at a flow rate of 0.6 mL/min.

| Sample concentration, (g/L) | Kenaf Core | CNF     | AH10    | AH30    | AH90    | AH180   |
|-----------------------------|------------|---------|---------|---------|---------|---------|
| HMF                         | 0.01175    | 0.01724 | 0.01725 | 0.01745 | 0.01827 | 0.02018 |
| Furfural                    | 0.05670    | 0.07531 | 0.07304 | 0.07155 | 0.06966 | 0.06623 |

**Table S1** Concentration of HMF and furfural after acid treatment at various time

#### Hemicellulose Removal

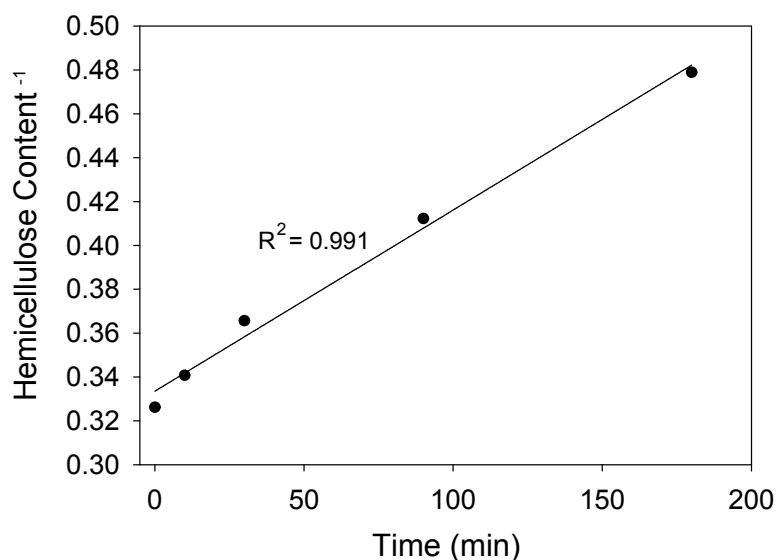

**Fig. S1** Reciprocal of hemicellulose content in holocellulose by acid treatment (hydrolysis) at various times.

## TEM

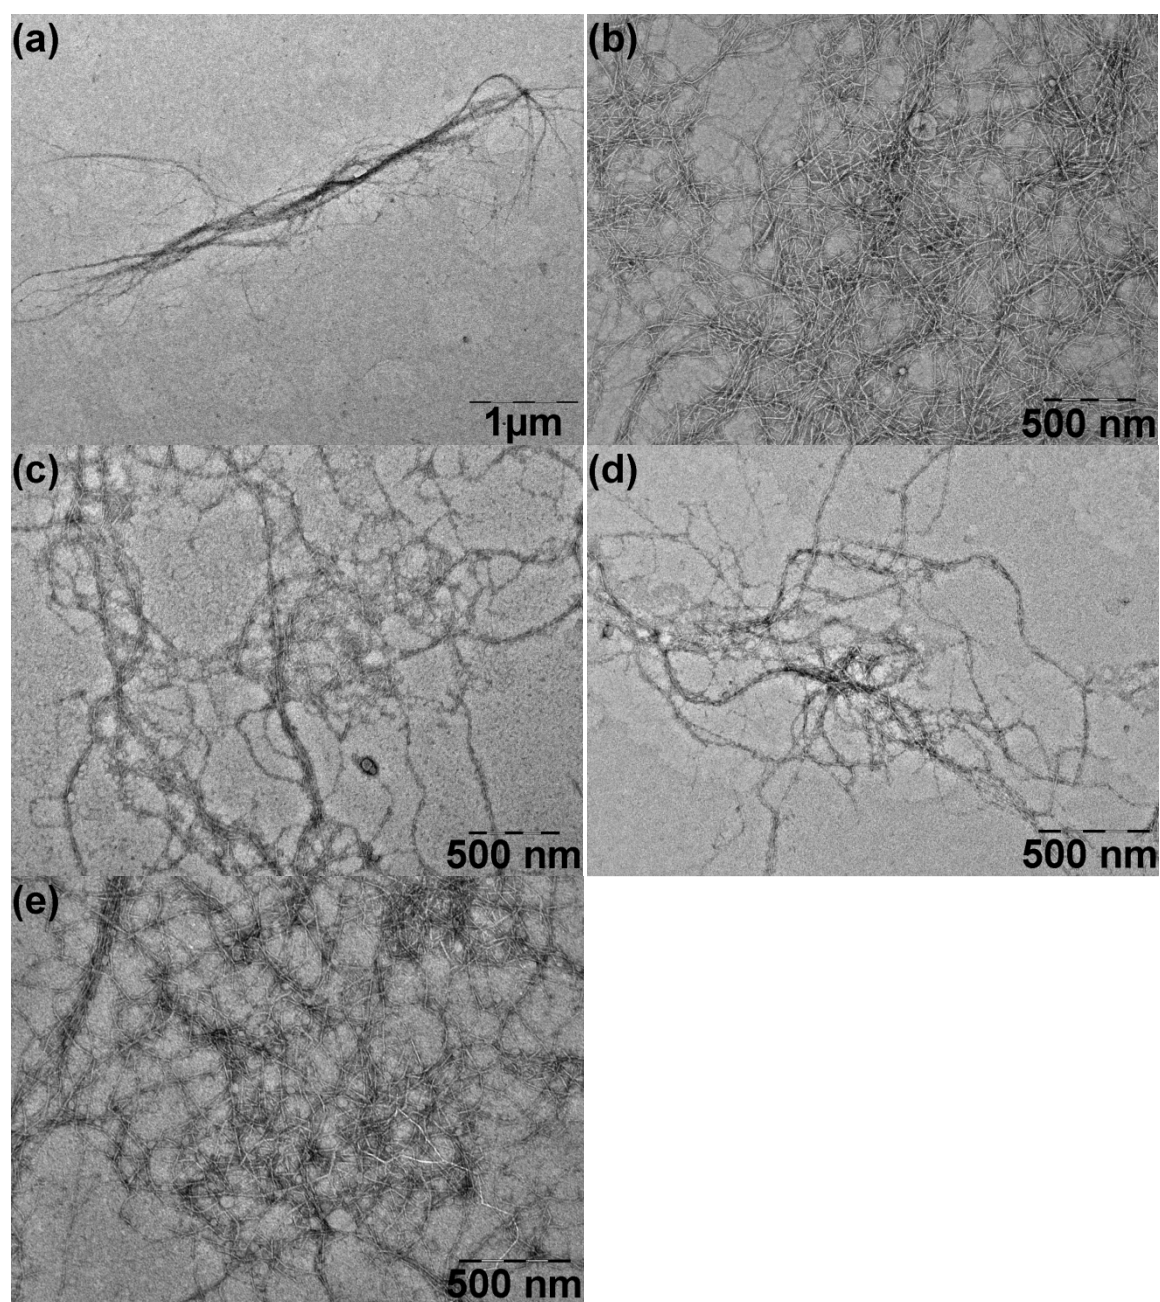

**Fig. S2** TEM images of (a) holocellulose and defibrillated holocellulose of different acid treatment time (b) AH 10, (c) AH 30 and (d) AH 90.

### Degree of Defibrillation (UV-Vis)

CNF and defibrillated acid treated holocellulose (AH 10, AH 30 and AH 90) of 0.7 wt.% was diluted in water into 0.035 wt.%. Dispersed fiber was sonicated for 2 minutes and analyzed immediately using UV-Vis spectrophotometer.

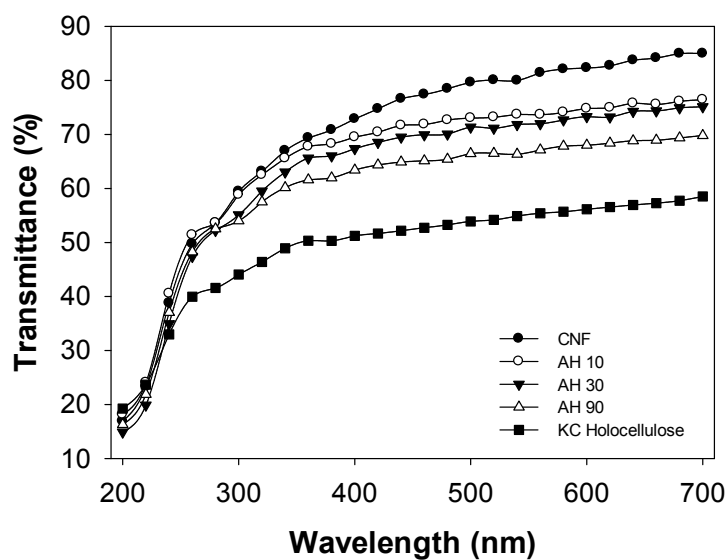

**Fig. S3** Transmittance of KC holocellulose, CNF and defibrillated acid treated holocellulose.
